1 **Fundamental and realized feeding niche breadths of sexual and asexual stick-insects**

2

3 Larose Chloé<sup>1\*</sup>, Parker Darren J.<sup>1,2</sup>, Schwander Tanja<sup>1\*</sup>

4

5 <sup>1</sup>Department of Ecology and Evolution, University of Lausanne, Switzerland

6 <sup>2</sup>Swiss Institute of Bioinformatics, Lausanne, Switzerland

7

8

9 **\*Corresponding authors:** [chloe.larose@unil.ch](mailto:chloe.larose@unil.ch), [tanja.schwander@unil.ch](mailto:tanja.schwander@unil.ch)

10 Department of Ecology and Evolution, University of Lausanne, Bâtiment Biophore, quartier

11 Unil-Sorge, CH-1015 Lausanne, Switzerland.

12 Tel +41 21 692 41 51; Fax: +41 21 692 4165

13

14

15

16

17

18 **Word count:** 195 words (abstract), 3123 words (main text)

19 **Reference count:** 37

20 **Table count:** 1

21 **Figure count:** 3

22

23

24 **Author Contributions:** CL and TS designed the study. CL and DJP conducted fieldwork and performed

25 experiments. CL analysed data with input from TS and DJP. CL and TS wrote the manuscript with input from DJP.

26 **ABSTRACT**

27

28 The factors contributing to the maintenance of sex over asexuality in natural populations remain  
29 largely unknown. Ecological divergences between lineages with different reproductive modes  
30 could help to maintain reproductive polymorphisms, at least transiently, but there is little  
31 empirical information on the consequences of asexuality for the evolution of ecological niches.  
32 Here, we investigated how niche breadths evolve following transitions from sexual reproduction  
33 to asexuality. We estimated and compared the realized feeding niche breadths of five  
34 independently derived asexual *Timema* stick insect species and their sexual relatives. We found  
35 that asexual species had a systematically narrower realized niche than sexual species. To  
36 investigate how the narrower realized niches of asexual versus sexual species come about, we  
37 quantified the breadth of their fundamental niches but found no systematic differences between  
38 reproductive modes. The narrow realized niches found in asexuals are therefore likely a  
39 consequence of biotic interactions that constrain realized niche size in asexuals more strongly  
40 than in sexuals. Interestingly, the fundamental niche was broader in the oldest asexual species  
41 compared to its sexual relative. This broad ecological tolerance may help explain how this  
42 species has persisted over more than a million years in absence of sex.

43

44

45 **Keywords:** Degree of specialization, Herbivorous insect, Host plant range, Realized versus  
46 fundamental niche, Sexual versus asexual reproduction, *Timema* stick insects

47

## 48 INTRODUCTION

49 The maintenance of obligate sex in natural populations, despite numerous disadvantages  
50 compared to other reproductive systems, is a major evolutionary paradox. Although there is a  
51 rich body of theory proposing potential benefits of sex, empirical studies evaluating such benefits  
52 under natural conditions remain scarce (reviewed in Neiman et al. 2018). A simple mechanism  
53 that could facilitate the maintenance of reproductive polymorphisms is niche differentiation  
54 between sexual and asexual species (Meirmans et al. 2012). Such niche differentiation could  
55 result from a difference in ecological optima between sexuals and asexuals (e.g., Case and Taper  
56 1986), or from situations where sexual species cover larger fractions of the available niche space  
57 than their asexual counterparts (e.g., Bell 1982).

58         Because asexual species derive from sexual ancestors, fundamental niches (i.e., the range  
59 of environmental conditions that allow for survival, growth and reproduction) in new asexual  
60 species should depend directly upon the fundamental niche found in the ancestral sexual species.  
61 How the fundamental niche in an ancestral sexual population translates to that found in an  
62 asexual population is however unclear. For example, the *Frozen Niche Variation* model (FNV)  
63 predicts that the phenotypic distribution of a new, recently derived asexual would be narrower  
64 than that of its genetically variable sexual ancestor, because a single sexual genotype will be  
65 “frozen” in the new asexual lineage (Vrijenhoek 1984, Case and Taper 1986, Case 1990, Weeks  
66 1993, Vrijenhoek and Parker Jr 2009; Fig. 1A). By contrast, the "*General-Purpose Genotype*"  
67 hypothesis (GPG; Lynch 1984; but see also Baker 1965; Parker et al. 1977) proposes that asexual  
68 lineages should generally have broader environmental tolerances than sexual individuals because  
69 of strong selection for plasticity in asexuals. Under this scenario, we would expect asexual  
70 populations to have broader ecological niches than sexual ones (Fig. 1B). The two hypotheses

71 are non-mutually exclusive. For example, by combining the FNV and GPG, we can suggest that  
72 young asexual lineages would feature, on average, narrow niches, while old ones would feature  
73 broad niches.

74       Regarding the breadth of the realized niche (i.e., the fraction of the fundamental niche  
75 used by organisms under natural conditions), there is currently no specific theory predicting  
76 similarities or differences between sexuals and asexuals. There are however several theories  
77 predicting that sex can accelerate the rate of adaptation compared to asexuality (Hill and  
78 Robertson 1966, Kondrashov 1988, Barton and Charlesworth 1998, Otto and Lenormand 2002).  
79 Sexual organisms therefore may be able to evolve adaptations to competitors, pathogens, or  
80 predators more rapidly than asexuals. As a consequence, the realized niche in asexual organisms  
81 may be smaller than in sexual organisms due to a reduced ability to respond to these biotic  
82 pressures.

83       Here we evaluate whether asexuality is associated with different niches and niche sizes  
84 than sexual reproduction, using herbivorous stick insects of the genus *Timema* as a model system  
85 and different host plants as a proxy for different niches. Seven independently derived asexual  
86 lineages have been identified in this genus, each with a closely related sexual counterpart  
87 (Schwander et al. 2011; Fig. 2). This allows us to perform replicate comparisons between sexual  
88 and asexual lineages. Moreover, the asexual *Timema* lineages vary in age (Law and Crespi 2002,  
89 Schwander et al. 2011), allowing us to assess the possible consequences of asexuality on niche  
90 breadth over a range from recently derived to long-term asexuality.

91       We first estimated the size of the realized feeding niches of sexuals and asexuals both at  
92 the species and at the population level in five sexual-asexual *Timema* sister species pairs, using  
93 occurrences on different host plants in natural populations. *Timema* feed on the leaves or the

94 needles of very diverse host plants, comprising both angiosperms and conifers, and the quality of  
95 these plants as a food source is highly variable (Larose et al. 2018). We then conducted feeding  
96 experiments with species from four sexual-asexual species pairs to estimate the size of their  
97 fundamental feeding niches. Finally, we evaluated the contribution of predation to shaping  
98 realized niches in sexuals and asexuals. *Timema* are characterized by different cryptic morphs on  
99 different host plants, both within and between species (Sandoval 1994a, 1994b, Nosil 2007,  
100 Sandoval and Crespi 2008). Previous studies have shown that the combination of selection  
101 imposed by predators and *Timema* host preference maintain a correlation between morph  
102 frequency and host-plant frequency between populations (Sandoval 1994a, Nosil 2004, Sandoval  
103 and Nosil 2005), indicating that color polymorphism and predation may be of key importance for  
104 realized niches in *Timema*.

105

## 106 **METHODS**

### 107 **Realized feeding niche breadths**

108 Data from a previous study that collected information on host plant use across all 23 known  
109 *Timema* species (Larose et al. 2018) allowed us to estimate the size of the realized feeding niche  
110 of sexuals and asexuals at the species level. To estimate the realized niche at the population  
111 level, we further performed a count of the number of individuals collected on each potential host  
112 plant across 30 populations from five species pairs (between two and six populations per species;  
113 Table S2). The size of the realized feeding niche per population was then quantified with the  
114 inversed Tau ( $\tau$ ) specialization index (Yanai et al. 2004), which ranges from 0 (pure specialist) to  
115 1 (complete generalist).

116

## 117 **Degree of color polymorphism**

118 Color phenotypes vary broadly in several *Timema* species but can be separated into a total of 14  
119 discrete morphs across all species (range 1-8 per species; Table S1). We recorded color morph  
120 frequencies from all sampling locations (Table S2) and used the Simpson diversity index to  
121 quantify the level of polymorphism (Simpson 1949). This index varies between 0 (here  
122 indicating color monomorphism) and 1 (indicating diversity of equally frequent color morphs).  
123 We then estimated the correlation between the degree of color polymorphism and the size of the  
124 realized feeding niche, both at the species and at the population levels with Phylogenetic  
125 Generalized Least Squares (PGLS) to account for phylogenetic non-independence among  
126 *Timema* species. These analyses were conducted using the ape (Paradis et al. 2004) and nlme  
127 (Pinheiro et al. 2009) R packages (R Core Team 2017) using a Brownian motion model for trait  
128 evolution.

129

## 130 **Fundamental feeding niche breadths**

131 To estimate the fundamental feeding niche breadths of sexual and asexual *Timema* species, we  
132 performed a feeding experiment and measured insect performance on different host plants. We  
133 chose seven plants known to be commonly used by several *Timema* species, while trying to  
134 cover the phylogenetic diversity of the host plants (Larose et al. 2018). Specifically, we chose  
135 four angiosperms: (*Ceanothus thyrsiflorus* (lilac, lil), *Adenostoma fasciculatum* (chamise, cha),  
136 *Quercus agrifolia* (oak), and *Arctostaphylos glauca* (manzanita, mz)), and three conifers:  
137 (*Pseudotsuga menziesii* (douglas fir, df), *Abies concolor* (white fir, wf), and *Sequoia*  
138 *sempervirens* (redwood, rdw)). Stick insects from eight *Timema* species (four sexual-aseexual  
139 species pairs) were collected from multiple field sites in California (Table S3). We only used

140 fourth-instar juvenile females for feeding experiments to minimize age-related effects on insect  
141 performance during our experiments. Between 10 and 20 such females were used per host plant  
142 to measure survival and weight gain during 10 days, for a total of 70-105 females per population  
143 (635 insects in total; Table S3).

144 We first used a generalized linear model (GLM) with a binomial error to compare  
145 survival and an ANOVA to compare the weight gain of all stick insects species on the different  
146 plants using R (R Core Team 2017). We then compared for each *Timema* species pair separately,  
147 the survival and weight gain of the sexual and asexual individuals, testing specifically for an  
148 interaction between reproductive mode and plant species, because a significant interaction  
149 between these two factors would indicate a difference in fundamental niche between sexuals and  
150 asexuals. Finally, we quantified the breadth of the fundamental feeding niche of the eight  
151 *Timema* species using again the inversed Tau index. We could not compare the fundamental  
152 niche of the *T. bartmani*/*T. tahoe* species pair because *T. tahoe* individuals of the appropriate  
153 developmental stage could not be collected in sufficient numbers for the feeding experiment.

154

## 155 **RESULTS**

### 156 **Realized feeding niche breadths**

157 For realized niches measured at the species level, the sexuals are more ecologically generalist in  
158 four out of five cases, as they used at least twice as many plants as their asexual relatives (Fig.  
159 3A). In the remaining case (*T. poppensis*/*T. douglasi*), the sexual and the asexual species used  
160 the same number of host plants in the wild (Fig. 3A). For realized niches measured at the  
161 population level, all ten species are relatively specialist (Tau indices varying between 0 and 0.48;  
162 Fig. S1B) and there were no significant differences in the degree of specialization between

163 sexual and asexual populations (GLM; p-value = 0.19). However, we did find that (within  
164 species) sexual populations vary more than asexual ones in their degree of specialization  
165 (Levene's test,  $F_{1,27} = 12.2$ , p-value < 0.002; Fig. S1B).

166 To assess potential interactions between color polymorphism and the number of different  
167 host plant species used, we compared the degree of color polymorphism within *Timema* species  
168 and populations with their degree of ecological specialization. At the species level, the size of the  
169 realized niche was correlated with the number of morphs of these species (correlation corrected  
170 with PGLS;  $r = 0.57$ , p-value < 0.003; Fig. S1). Similar to the size of the species-level realized  
171 niche, the asexuals contain two to five times fewer morphs than their sexual relatives, with the  
172 exception of *T. poppensis*/*T. douglasi*, in which both species have only a single morph (Table  
173 S1). By contrast, at the population level, we did not detect any link between color polymorphism  
174 and the size of the realized feeding niche (Pearson's correlation;  $r = 0.14$ , p-value = 0.46; Fig.  
175 S2B).

176

### 177 **Fundamental feeding niche breadths**

178 Survival and weight gain vary widely among the different studied *Timema* species when fed with  
179 different plants ( $p < 2.2 \times 10^{-16}$  for survival and  $F_{7,292} = 8.94$ ,  $p < 5.5 \times 10^{-10}$  for weight gain; Fig.  
180 S1A, Fig. 3B), and Tau indices based on survival or weight gain were strongly correlated  
181 (Pearson's correlation,  $r = 0.96$ ,  $p < 0.0001$ ; Fig. 3B). We found significant differences in the  
182 fundamental niche breadths of sexuals compared to asexual species in two species pairs, (*T.*  
183 *cristinae*/*T. monikensis* and *T. podura*/*T. genevieveae*; Fig. S1A, Fig. 3B). The remaining two  
184 pairs (*T. poppensis*/*T. douglasi* and *T. californicum*/*T. shepardi*) showed no significant difference  
185 (Fig. 3). Interestingly, *T. monikensis* and *T. genevieveae*, which represent the most recent asexual



186 lineage and oldest asexual lineage tested respectively, were characterized by an opposite result.  
187 *T. monikensis* was significantly more specialist (Tau based on weight gain = 0.27, 95% CI 0.22 -  
188 0.29; survival = 0.21, 95% CI 0.13 - 0.29) than its sexual relative *T. cristinae* (Tau based on  
189 weight gain = 0.47, 95% CI 0.41 - 0.55; survival = 0.46, 95% CI 0.34 - 0.58; Fig. 3B). On the  
190 contrary, the ancient asexual *T. genevieveae* was significantly more generalist (Tau based on  
191 weight gain = 0.77, 95% CI 0.71 - 0.82; survival = 0.78, 95% CI 0.68 - 0.88) than its sexual sister  
192 species *T. podura* (Tau based on weight gain = 0.54, 95% CI 0.48 - 0.58; survival = 0.37, 95%  
193 CI 0.27 - 0.47; Fig. 3B). Finally, we found that the fundamental feeding niche breadths were not  
194 correlated with the sizes of their realized feeding niche, neither at the species level (Pearson's  
195 correlation;  $r = 0.13$ ,  $p = 0.77$ ; Fig. S1A), nor at the population level ( $r = -0.14$ ,  $p = 0.50$ ; Fig. S1B).

196 To test whether asexual and sexual species feature different fundamental feeding niches,  
197 we modeled, in each species pair, the survival and weight gain as functions of the species'  
198 reproductive mode and of the experimental feeding treatments (with interaction term). A  
199 significant interaction would indicate that sexual and asexual species have different fundamental  
200 feeding niches. We found a significant interaction for the pair *T. californicum* - *T. shepardii*,  
201 however this was only the case for survival, and only a trend for weight gain (Table 1). We also  
202 found a significant interaction for the pair *T. poppensis* - *T. douglasi*, but only for weight gain,  
203 not survival (Table. 1). In addition, we found a marginally non-significant interaction for weight  
204 gain in the species pair *T. podura* - *T. genevieveae* (Table. 1). These results suggest that in two or  
205 three species pairs, asexuals and sexuals may have diverged in their fundamental niches.

206

207

208

## 209 **DISCUSSION**

210 We investigated if sexual and asexual stick insect species and populations differ in their realized  
211 feeding niches and how such differences come about. We find that *Timema* asexuals generally  
212 feature smaller realized feeding niches than their sexual counterparts. Specifically, in four out of  
213 five sexual-aseexual *Timema* species pairs, sexuals use about twice as many plants as asexuals in  
214 nature. In the fifth species pair, *T. poppensis*/*T. douglasi*, sexuals and asexuals use the same  
215 number of host plants. This species pair is likely an exception to the general pattern in *Timema*  
216 because of their ability to use the hostplant redwood. We have shown in a previous study that  
217 sexual *Timema* species adapted to this specific host plant are ecologically highly specialized,  
218 perhaps because of reduced biotic pressures on redwood (Larose et al. 2018). This high level of  
219 ecological specialization in the sexual makes further specialization in the related asexual  
220 relatively unlikely.

221 To develop insights into how the narrower realized niches of asexual versus sexual  
222 *Timema* species come about, we quantified the size of their fundamental feeding niches. This  
223 allowed us to test if the size of the fundamental niche constrains the size of the realized niche,  
224 i.e., whether the reduced realized niche size in asexuals results from a reduced intrinsic ability to  
225 use different host plants. Fundamental feeding niche size varied significantly among all *Timema*  
226 species, however there was no overall difference between reproductive modes. Fundamental  
227 niche size therefore does not explain why sexuals have broader realized niches than asexuals in  
228 *Timema*. Specifically, in two species pairs the estimated fundamental niche size was very similar  
229 for sexuals and asexuals. In the other two pairs, the fundamental niche differed between sexuals  
230 and asexuals, however in opposite directions; In one species pair (*T. cristinae*/*T. monikensis*) the  
231 asexual species had a narrower fundamental niche than the sexual one, while in the other (*T.*

232 *podura/T. genevieveae*) the asexual species had a broader fundamental niche than the sexual one.  
233 The latter case is particularly interesting because *T. genevieveae* is a very old asexual lineage  
234 (~1.5-2 myr) and the oldest asexual *Timema* known (Schwander *et al.* 2011). The broad  
235 fundamental feeding niche in *T. genevieveae* is consistent with predictions from the *General*  
236 *Purpose Genotype* (GPG) theory, which posits that clones with broad environmental tolerances  
237 (i.e., broad fundamental niches) should be selectively favored as such clones would be  
238 characterized by low variance in fitness across environments (Lynch 1984; Fig. 1B). General  
239 purpose genotypes are also believed to contribute to the persistence of one of the oldest known  
240 asexual species, the darwinulid ostracod *Darwinula stevensoni*, which has probably existed as an  
241 obligate asexual for 25 million years (Straub 1952). It shows almost no morphological (Rossetti  
242 and Martens 1998) or genetic (Schön *et al.* 1998) variability, yet it is a very common and  
243 cosmopolitan species (Griffiths and Butlin 1994) with broad tolerances for salinity and  
244 temperature (Van Doninck *et al.* 2002).

245 In contrast to the old asexual *T. genevieveae*, our findings in the youngest studied *Timema*  
246 asexual, *T. monikensis*, are consistent with the *Frozen niche variation* model (FNV). This model  
247 suggests that the phenotypic distribution (i.e., fundamental niche) of a young, recently derived  
248 asexual lineage will be narrower than that of its genetically variable sexual ancestor (Vrijenhoek  
249 1984; Fig. 1A). Indeed, *T. monikensis* is the only studied asexual that features a narrower  
250 fundamental niche than its sexual relative *T. cristinae* (Figs. 3B; Fig. S1A).

251 Given that asexual *Timema* do not generally have narrower fundamental niches than  
252 sexual *Timema*, the narrow realized niches in asexuals are likely a consequence of biotic  
253 interactions that affect niche size in asexuals more strongly than in sexuals. A likely biotic factor  
254 affecting realized niches in *Timema* is selection imposed by predators (e.g., Sandoval 1994a,

255 1994b, Nosil et al. 2003, Nosil 2004). Several *Timema* species feature a natural color  
256 polymorphism conferring crypsis on different host plants (Sandoval 1994a; Sandoval 1994b) and  
257 we therefore tested for links between color polymorphism, realized niche size and reproductive  
258 mode in *Timema*. The sister species *T. douglasi* and *T. poppensis* do not feature any color  
259 polymorphism, but in the four remaining species pairs, intra-population color polymorphism is  
260 always higher in the sexual than asexual species. However, the level of polymorphism was only  
261 correlated to the size of the realized niche at the species level, not at the population level.  
262 Nevertheless, this higher degree of color polymorphism in sexuals may allow for reduced  
263 predation rates on a larger number of plants relative to asexuals, potentially explaining the  
264 narrower realized niche size in asexual species.

265 In conclusion, we provide the first comparative study of realized and fundamental niches  
266 in replicated asexual-sexual species pairs. We found that sexual *Timema* species have a larger  
267 realized niche than asexual ones, but this difference is not explained by a similar difference in  
268 fundamental niche size. Thus, the smaller realized niches in asexuals are likely a consequence of  
269 biotic interactions that constrain asexuals more strongly than sexuals. Verifying potential links  
270 between population-level color polymorphism, realized feeding niche size and biotic interactions  
271 (especially predation and competition) will be a challenge for future studies. Finally, our finding  
272 that the oldest asexual *Timema* lineage is more generalist than its sexual relative could help  
273 explain its unusually long maintenance in the absence of sex.

274

## 275 **Acknowledgments**

276 We thank Armand Yazdani and Ian S. Ford for their help in the field, and Giacomo Bernardi at  
277 UC Santa-Cruz for lab space. This study was supported by grants PP00P3\_139013 and  
278 PP00P3\_170627 of the Swiss FNS to TS.

279 **REFERENCES**

- 280 Baker, H. G. 1965. Characteristics and mode of origin of weeds. Pages 147-172 The genetics of  
281 colonizing species. Academic Press, New York.
- 282 Barton, N. H., and B. Charlesworth. 1998. Why sex and recombination? *Science* 281:1986–1990.
- 283 Bast, J., D. J. Parker, Z. Dumas, K. Jalvingh, P. Tran Van, K. Jaron, E. Figuet, N. Galtier, and T.  
284 Schwander. 2018. Consequences of asexuality in natural populations: insights from stick  
285 insects. *Molecular Biology and Evolution* 35:1668-1677.
- 286 Bell, G. 1982. The masterpiece of nature. The evolution and genetics of sexuality. University of  
287 California Press, Berkeley
- 288 Case, T. J. 1990. Pattern of coexistence in sexual and asexual species of *Cnemidophorus* lizards.  
289 *Oecologia* 83:220–227.
- 290 Case, T. J., and M. L. Taper. 1986. On the coexistence and coevolution of asexual and sexual  
291 competitors. *Evolution* 40:366–387.
- 292 Van Doninck, K., I. Schön, L. De Bruyn, and K. Martens. 2002. A general purpose genotype in  
293 an ancient asexual. *Oecologia* 132:205–212.
- 294 Griffiths, H. I., and R. K. Butlin. 1994. *Darwinula stevensoni*: a brief review of the biology of a  
295 persistent parthenogen. Pages 27–36 The evolutionary ecology of reproductive modes in  
296 non-marine Ostracoda. University Press, Greenwich.
- 297 Hill, W. G., and A. Robertson. 1966. The effect of linkage on limits to artificial selection.  
298 *Genetics Research* 8:269–294.
- 299 Kondrashov, A. S. 1988. Deleterious mutations and the evolution of sexual reproduction. *Nature*  
300 336:435–440.
- 301 Larose, C., S. Rasmann, and T. Schwander. 2018. Evolutionary dynamics of specialization in  
302 herbivorous stick insects. bioRxiv <https://doi.org/10.1101/367706>
- 303 Law, J. H., and B. J. Crespi. 2002. Recent and ancient asexuality in *Timema* walking sticks.  
304 *Evolution* 56:1711–1717.
- 305 Lynch, M. 1984. Destabilizing hybridization, general-purpose genotypes and geographic  
306 parthenogenesis. *The Quarterly Review of Biology* 59:257–290.
- 307 Meirmans, S., P. G. Meirmans, and L. R. Kirkendall. 2012. The costs of sex: facing real-world  
308 complexities. *The Quarterly Review of Biology* 87:19–40.
- 309 Neiman, M., P. G. Meirmans, T. Schwander, and S. Meirmans. 2018. Sex in the wild: why field-

- 310 based studies play a critical role in resolving the problem of sex. *Evolution*, in press.
- 311 Nosil, P. 2004. Reproductive isolation caused by visual predation against migrants between  
312 divergent environments. *Proceedings of the Royal Society of London Series B-Biological*  
313 *Sciences* 271:1521–1528.
- 314 Nosil, P. 2007. Divergent host plant adaptation and reproductive isolation between ecotypes of  
315 *Timema cristinae* walking sticks. *The American Naturalist* 169:151–162.
- 316 Nosil, P., B. J. Crespi, and C. P. Sandoval. 2003. Reproductive isolation driven by the combined  
317 effects of ecological adaptation and reinforcement. *Proceedings of the Royal Society of*  
318 *London Series B-Biological Sciences* 270:1911–1918.
- 319 Otto, S. P., and T. Lenormand. 2002. Resolving the paradox of sex and recombination. *Nature*  
320 *Reviews Genetics* 3:252.
- 321 Paradis, E., J. Claude, and K. Strimmer. 2004. APE: Analyses of phylogenetics and evolution in  
322 R language. *Bioinformatics* 20:289–290.
- 323 Parker, E. D., R. K. Selander, R. O. Hudson, and L. J. Lester. 1977. Genetic diversity in  
324 colonizing parthenogenetic cockroaches. *Evolution* 31:836-842.
- 325 Pinheiro, J. D. B., S. DebRoy, and D. Sarkar. 2009. nlme: Linear and nonlinear mixed effects  
326 models. R package version 3:96.
- 327 R Core Team. 2017. R: A language and environment for statistical computing. R foundation for  
328 statistical computing, Vienna, Austria.
- 329 Riesch, R., M. Muschick, D. Lindtke, R. Villoutreix, A. A. Comeault, T. E. Farkas, K. Lucek, E.  
330 Hellen, V. Soria-Carrasco, S. R. Dennis, C. F. de Carvalho, R. J. Safran, C. P. Sandoval, J.  
331 Feder, R. Gries, B. J. Crespi, G. Gries, Z. Gompert, P. Nosil, C. F. De Carvalho, R. J.  
332 Safran, C. P. Sandoval, J. Feder, R. Gries, B. J. Crespi, G. Gries, Z. Gompert, and P. Nosil.  
333 2017. Transitions between phases of genomic differentiation during stick-insect speciation.  
334 *Nature Ecology & Evolution* 1:1–13.
- 335 Rossetti, G. and K. Martens. 1998. Taxonomic revision of the recent and holocene  
336 representatives of the family Darwinulidae (Crustacea, Ostracoda), with a description of  
337 three new genera. *Bulletin de l'Institut Royal des Sciences Naturelles de Belgique, Sciences*  
338 *de la Terre* 68:55-110.
- 339 Sandoval, C. P. 1994a. Differential visual predation on morphs of *Timema cristinae*  
340 (Phasmatodeae: Timemidae) and its consequences for host-range. *Biological Journal of the*

- 341 Linnean Society 52:341–356.
- 342 Sandoval, C. P. 1994b. The effects of the relative geographic scales of gene flow and selection  
343 on morph frequencies in the walking-stick *Timema cristinae*. *Evolution* 48:1866–1879.
- 344 Sandoval, C. P., and B. J. Crespi. 2008. Adaptive evolution of cryptic coloration: The shape of  
345 host plants and dorsal stripes in *Timema* walking-sticks. *Biological Journal of the Linnean*  
346 *Society* 94:1–5.
- 347 Sandoval, C. P., and P. Nosil. 2005. Counteracting selective regimes and host preference  
348 evolution in ecotypes of two species of walking-sticks. *Evolution* 59:2405–2413.
- 349 Schön, I., R. K. Butlin, H. I. Griffiths, K. Martens, I. Schon, R. K. Butlin, H. I. Griffiths, and K.  
350 Martens. 1998. Slow molecular evolution in an ancient asexual ostracod. *Proceedings of the*  
351 *Royal Society of London B: Biological Sciences* 265:235–242.
- 352 Schwander, T., L. Henry, and B. J. Crespi. 2011. Molecular evidence for ancient asexuality in  
353 *Timema* stick insects. *Current Biology* 21:1129–1134.
- 354 Simpson, E. H. 1949. Measurement of diversity. *Nature* 163:688.
- 355 Straub, E. W. 1952. Mikropalaontologische Untersuchungen im Tertiär zwischen Ehingen und  
356 Ulm an der Donau. *Geologisches Jahrbuch* 66:433–524.
- 357 Vrijenhoek, R. C. 1984. Ecological differentiation among clones: the frozen niche variation  
358 model. *Population biology and evolution*:217–231.
- 359 Vrijenhoek, R. C., and E. D. Parker Jr. 2009. Geographical parthenogenesis: General purpose  
360 genotypes and Frozen niche variation. Pages 99–131 *Lost sex. The Evolutionary biology of*  
361 *parthenogenesis*. Springer, Berlin.
- 362 Weeks, S. C. 1993. The effects of recurrent clonal formation on clonal invasion patterns and  
363 sexual persistence: A Monte Carlo simulation of the frozen niche-variation model. *The*  
364 *American Naturalist* 141:409–427.
- 365 Yanai, I., H. Benjamin, M. Shmoish, V. Chalifa-Caspi, M. Shklar, R. Ophir, A. Bar-Even, S.  
366 Horn-Saban, M. Safran, E. Domany, D. Lancet, and O. Shmueli. 2004. Genome-wide  
367 midrange transcription profiles reveal expression level relationships in human tissue  
368 specification. *Bioinformatics* 21:650–659.
- 369

370 **TABLES**

371

372 **Table 1. Effect of experimental feeding treatments and reproductive mode on survival and**  
 373 **weight gain of insects.**

| <i>Timema</i> species pair | Factors tested in the statistical models           | Survival                  | Weight gain                                                 |
|----------------------------|----------------------------------------------------|---------------------------|-------------------------------------------------------------|
| <b>Pair2:</b>              | [Reproductive mode]                                | 1.1x10 <sup>-05</sup> *** | F <sub>(1, 34)</sub> = 3.9, p = 0.054 •                     |
| <i>T. cristinae</i> /      | [Feeding treatment]                                | 2.9x10 <sup>-09</sup> *** | F <sub>(5, 34)</sub> = 14.8, p = 10.0x10 <sup>-08</sup> *** |
| <i>T. monikensis</i>       | [Reproductive mode: Feeding treatment] interaction | 0.59                      | F <sub>(2, 34)</sub> = 3.9, p = 0.222                       |
| <b>Pair3:</b>              | [Reproductive mode]                                | 0.33                      | F <sub>(1, 107)</sub> = 4.9, p = 0.03 *                     |
| <i>T. poppensis</i> /      | [Feeding treatment]                                | 0.20                      | F <sub>(6, 107)</sub> = 13.1, p = 4.6x10 <sup>-11</sup> *** |
| <i>T. douglasi</i>         | [Reproductive mode: Feeding treatment] interaction | 0.44                      | F <sub>(6, 107)</sub> = 5.5, p = 5.4x10 <sup>-05</sup> ***  |
| <b>Pair4:</b>              | [Reproductive mode]                                | 0.009 ***                 | F <sub>(1, 71)</sub> = 13.7, p = 0.0004 ***                 |
| <i>T. californicum</i> /   | [Feeding treatment]                                | 4.8x10 <sup>-05</sup> *** | F <sub>(6, 71)</sub> = 19.4, p = 2.9x10 <sup>-13</sup> ***  |
| <i>T. shepardii</i>        | [Reproductive mode: Feeding treatment] interaction | 0.0009 ***                | F <sub>(6, 71)</sub> = 1.9, p = 0.09 •                      |
| <b>Pair5:</b>              | [Reproductive mode]                                | 0.0004 ***                | F <sub>(1, 80)</sub> = 4.4, p = 0.04 *                      |
| <i>T. podura</i> /         | [Feeding treatment]                                | 6.4x10 <sup>-19</sup> *** | F <sub>(6, 80)</sub> = 22.1, p = 3.5x10 <sup>-15</sup> ***  |
| <i>T. genevieveae</i>      | [Reproductive mode: Feeding treatment] interaction | 0.35                      | F <sub>(5, 80)</sub> = 2.1, p = 0.08 •                      |

374

375



376 **FIGURE LEGENDS**

377

378 **Figure 1. (A) The frozen niche variation model.** (a) A sexual population (broad curve) exhibits  
379 genetic variation for the use of a natural resource (here symbolized by a range of hypothetical  
380 plants). (b) A new asexual clone is produced, comprising a small subset of the genotypic  
381 diversity contained in its sexual ancestor (c) A second clone is produced from a different sexual  
382 genotype characterized by a different ecological niche. The niche breadth of the sexual  
383 population as a whole is larger than the one of each individual clone. Figure modified from  
384 Vrijenhoek and Parker, 2009. **(B) General purpose genotype hypothesis.** (a) Individuals in a  
385 sexual population vary in the range of their environmental tolerances (narrow to broad  
386 phenotypic plasticity) (b) Clones are produced from different genotypes in the sexual population  
387 with different levels of phenotypic plasticity. (c and d) Natural selection favors clones with  
388 broader tolerances such that clones may feature higher levels of phenotypic plasticity than the  
389 sexual population as a whole (e.g. extreme case of clone 5). Figure adapted from Vrijenhoek and  
390 Parker, 2009.

391

392 **Figure 2. *Timema* phylogeny highlighting the sexual and asexual species.** Phylogeny redrawn  
393 from Riesch *et al.* (2017) with the seven asexual lineages added from Schwander *et al.* 2011 (in  
394 blue). The used sexual species are labeled in red. Pair numbers correspond to the most recent  
395 (i.e., pair 1) to the most ancient (i.e., pair 5) transition to asexuality (ranking from Bast *et al.*  
396 2018).

397

398 **Figure 3. Realized (A) and fundamental (B) feeding niche breadths of sexual and asexual**  
399 ***Timema* stick insects, measured at the species level.** The pairs are listed from the most recent  
400 to the most ancient transition to asexuality (ranking from Bast *et al.* 2018). For the size of the  
401 fundamental niche we used the specificity indices Tau based on weight gain and survival during  
402 ten days. Stars indicate significant differences of the Tau indices of the sexual and asexual  
403 species of a pair. For species pair numbers, see Fig. 2.

404 **FIGURES**

405

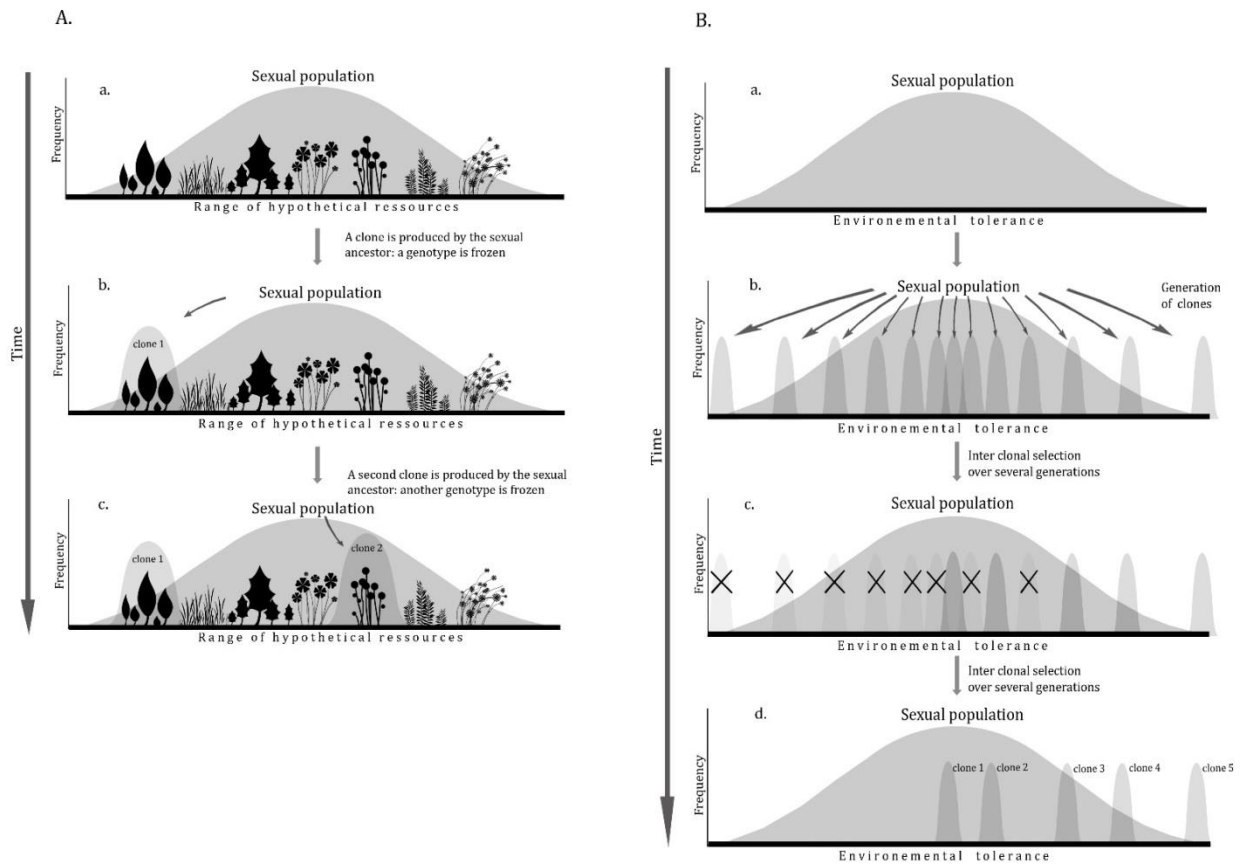

406

407

408 **Figure 1**

409

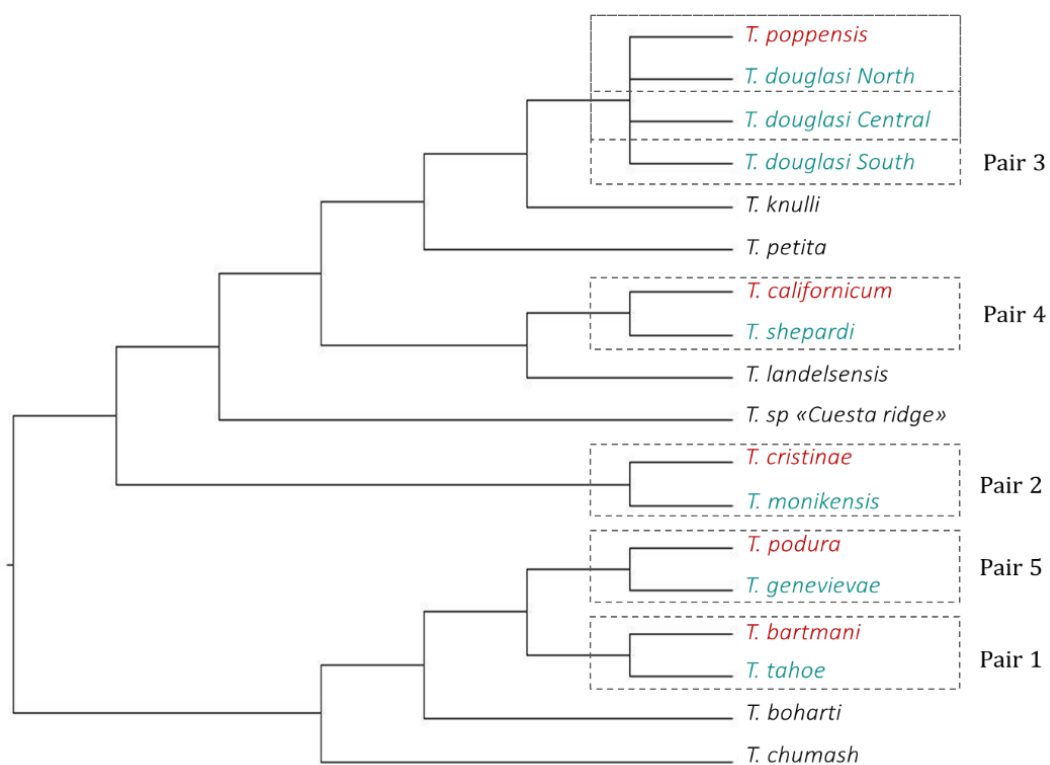

410

411 **Figure 2**

412

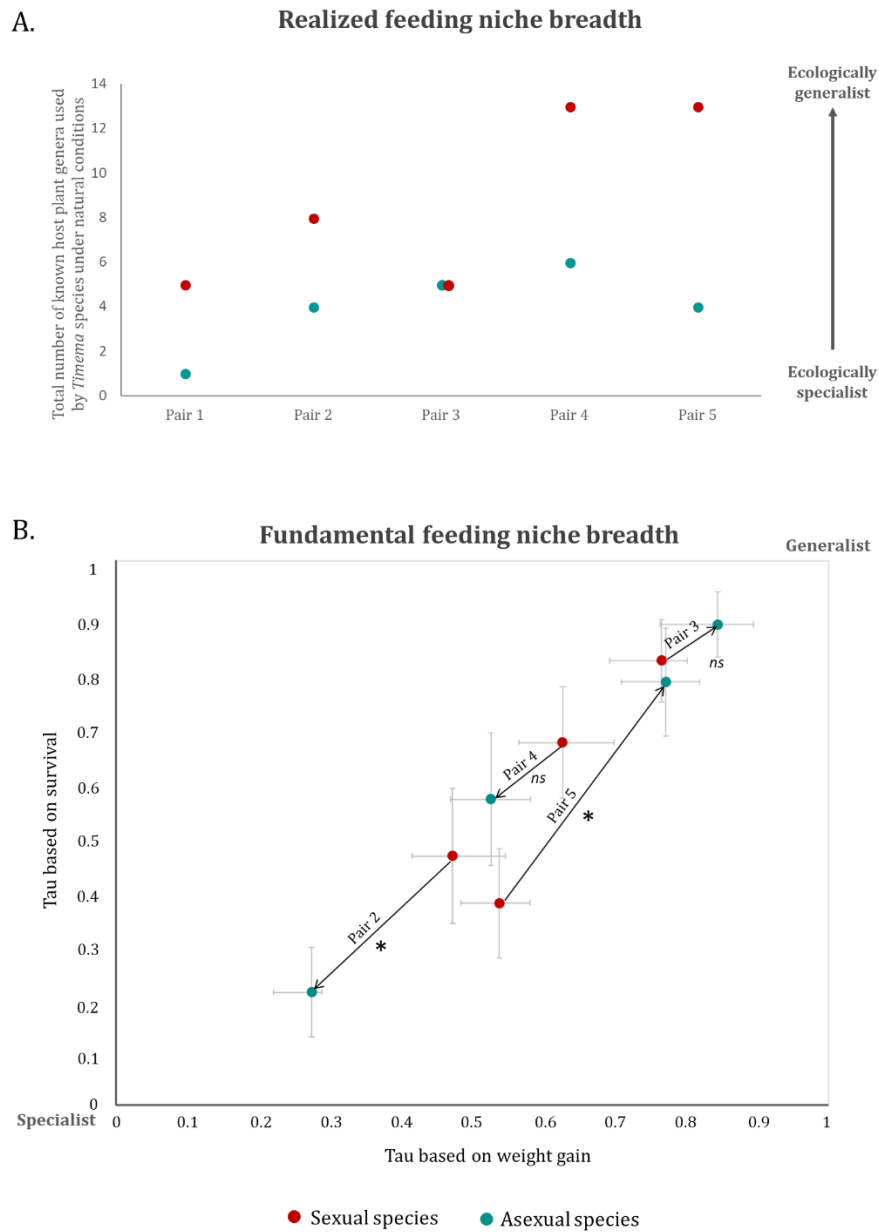

413  
414 **Figure 3**  
415

416

## SUPPORTING INFORMATION

417

418

**Table S1. Color morphs of ten *Timema* species**

| <i>Timema</i> species  | Color morphs <sup>1</sup> |     |    |    |    |   |    |    |    |    |     |   |     |     |
|------------------------|---------------------------|-----|----|----|----|---|----|----|----|----|-----|---|-----|-----|
|                        | b                         | bl  | br | db | dg | g | gr | oc | ol | sg | sgp | r | y   | w   |
| <i>T. bartmani</i>     |                           |     | x  |    |    | x | x  |    | x  | x  | x   |   |     |     |
| <i>T. tahoe</i>        |                           |     | x  |    |    | x |    |    |    | x  | x   |   |     |     |
| <i>T. cristinae</i>    | x                         |     |    | x  |    | x | x  | x  |    | x  |     | x | x   |     |
| <i>T. monikensis</i>   | x                         |     |    | x  |    | x |    |    |    |    |     |   | x   |     |
| <i>T. poppensis</i>    |                           |     |    |    |    | x |    |    |    |    |     |   | (x) |     |
| <i>T. douglasi</i>     |                           |     |    |    |    | x |    |    |    |    |     |   | (x) |     |
| <i>T. californicum</i> | x                         | (x) |    |    |    | x | x  |    |    |    |     | x | x   | (x) |
| <i>T. shepardii</i>    |                           |     |    |    |    | x |    |    |    |    |     |   | (x) |     |
| <i>T. podura</i>       | x                         |     | x  | x  | x  | x |    |    | x  |    |     |   |     |     |
| <i>T. genevieveae</i>  |                           |     |    |    | x  |   |    |    |    |    |     |   |     |     |

<sup>1</sup>b, beige; bl, blue ; br, brown, db, dark brown, dg, dark grey; g, green; gr, grey; oc, ochre; ol, olive; sg, striped green; sgp, striped green with pink head; r, red; y, yellow; w, white

A cross indicates that a specific morph has been observed in a given species. A cross in brackets indicates that the morph was observed at a frequency of less than 0.1% in a given species, all populations combined.

419

420

421

422

423

424

425

426

427 **Table S2. *Timema* populations sampled.** Number of individuals refers to the total number of  
 428 individuals sampled in these locations on different host plants. We only selected locations in  
 429 which at least three plants from the known host plant set were present.

| <b>Timema species</b>                    | <b>Location name (GPS coordinates)</b>        | <b>Number of individuals per host plant sampled<sup>1</sup></b> | <b>Morph frequency<sup>2</sup> per sampling location</b> |
|------------------------------------------|-----------------------------------------------|-----------------------------------------------------------------|----------------------------------------------------------|
| <i>T. bartmani</i>                       | YMCA<br>(34°09'48.8"N 116°54'22.6"W)          | 0 oak, 0 pin, 350 wf                                            | 17%br, 34%g, 44%gr,5%ol                                  |
|                                          | Jenks lake<br>(34°09'55.1"N 116°52'56.4"W)    | 1 ced, 12 pin, 65 wf                                            | 8%br, 23%gr, 4%ol, 12%,<br>38%sg, 15%sgp                 |
| <i>T. tahoe</i>                          | Bliss<br>(38°58'31.9"N 120°05'58.6"W)         | 0oak, 0pin, 72 wf                                               | 5%br, 32%gr, 36%sg,<br>27%sgp,                           |
|                                          | Vista<br>(38°45'34.8"N 120°11'57.2"W)         | 0oak, 0pin, 51wf                                                | 23%gr, 56%sg, 21%sgp                                     |
|                                          | SN<br>(39°03'33.0"N 119°56'40.0"W)            | 0oak, 0pin, 26wf                                                | 57%sg, 43%sgp                                            |
| <i>T. cristinae</i>                      | Ojai1<br>(34°31'01.7"N 119°16'39.7"W)         | 245 lil, 73 mah, 6 mz,<br>70 oak, 5 toy                         | 2%b, 4%db, 87%g, 5%r, 1%y                                |
|                                          | Ojai2<br>(34°30'20.0"N 119°16'47.5"W)         | 23lil, 62 mah, 11 mz,<br>28 oak                                 | 3%b, 3%db, 69%g, 25%r                                    |
|                                          | Ojai3<br>(34°31'59.6"N 119°14'51.8"W)         | 8 cha, 2 lil, 20 mah, 8<br>oak                                  | 9%b, 6%db, 59%g, 6%gr,<br>4%r, 9%sg, 7%y                 |
|                                          | WTA1<br>(34°30'46.6"N 119°46'41.7"W)          | 597 cha, 317 mah, 78<br>oak                                     | 3%b, 10%db, 23%g, 3%oc,<br>61%sg <1%y                    |
|                                          | WTA2<br>(34°30'22.3"N 119°46'05.3"W)          | 81 cha, 1 mah, 8 mz,<br>9 oak, 2 toy                            | 3%b, 10%dgb 21%g, 2%oc,<br>64%sg                         |
|                                          | WTA3<br>(34°30'56.8"N 119°46'43.7"W)          | 60 cha, 24 lil, 5 mz, 7<br>toy                                  | 2%db, 21%g, 7%oc, 69%sg,<br>1%r                          |
|                                          | WTA4<br>(34°29'58.3"N 119°43'08.2"W)          | 100 cha, 253 mah, 2<br>oak                                      | 4%b, 7%db, 80%g, 2%oc,<br>7%r                            |
|                                          | <i>T. monikensis</i>                          | Sycamore<br>(34°06'33.7"N 118°54'51.0"W)                        | 0 cha, 9 lil, 0 oak, 0<br>rdw                            |
| For Sale<br>(34°06'53.6"N 118°51'11.3"W) |                                               | 0 lil, 0 oak,13rdw                                              | 9%b, 13%db, 69%g, 9%y                                    |
| Decker<br>(34°06'10.6"N 118°51'42.4"W)   |                                               | 12 lil, 0 mz, 0 oak, 0<br>rdw                                   | 23%b, 35%db, 42%g                                        |
| <i>T. poppensis</i>                      | Fish Rock<br>(38°49'05.1"N 123°35'03.5"W)     | 137 df, 0 lil, 14 rdw                                           | 100%g                                                    |
|                                          | Fish Rock2<br>(38°54'57.1"N 123°18'00.6"W)    | 34 df, 0 oak, 32 rdw                                            | 100%g                                                    |
|                                          | Bear Creek<br>(37°09'56.2"N 122°00'56.4"W)    | 85 df, 0 oak, 35 rdw                                            | 100%g                                                    |
|                                          | Madonna<br>(37°01'07.5"N 121°43'32.0"W)       | 0 mz, 0 oak, 403 rdw                                            | 100%g                                                    |
| <i>T. dougasi</i>                        | Orr Springs 1<br>(39°12'44.5"N 123°18'30.2"W) | 42 df, 0 cha, 2 mz, 0<br>oak                                    | 99.99%g, 0.01%y                                          |

|                        |                                               |                                    |                                      |
|------------------------|-----------------------------------------------|------------------------------------|--------------------------------------|
|                        | Manchester 12<br>(38°58'57.2"N 123°28'10.4"W) | 1073 df, 5 mz, 0 oak               | 100%g                                |
| <i>T. californicum</i> | Skyline<br>(37°14'43.6"N 122°06'37.0"W)       | 2 cha, 18 mz, 43 oak               | 8%b, 89%g, 3%r                       |
|                        | Saratoga<br>(37°11'47.0"N 122°02'27.1"W)      | 4 cha, 12 mz, 4 oak                | 12%b, 82%g, <1%gr, 4%r, 1%y          |
|                        | Summit<br>(37°02'43.2"N 121°45'11.6"W)        | 51 mz, 0 oak, 0 rdw                | 10%b, 2%bl, 85%g, 3%r                |
| <i>T. shepardii</i>    | Elk<br>(39°16'42.2"N 122°55'39.6"W)           | 0 lil, 304 mz, 0 pin, 0 oak        | 100%g                                |
|                        | Manchester 2<br>(38°57'22.4"N 123°32'04.9"W)  | 0 df, 30 mz, 0 oak                 | 100%g                                |
|                        | Orr Springs 2<br>(39°12'02.2"N 123°17'38.1"W) | 1df, 0 lil, 200 mz                 | 99.99%g, 0.01%y                      |
| <i>T. podura</i>       | Indian<br>(33°47'50.5"N 116°46'35.5"W)        | 79 cha, 60 lil, 0 mah, 7 mz, 0 oak | 5%b, 36%db, 24%dg, 23%g, 2%oc, 10%ol |
|                        | Poppet<br>(33°51'36.9"N 116°50'20.4"W)        | 45 cha, 0 lil, 0 mz                | 4%b, 14%db, 14%dg, 45%g, 23%ol       |
|                        |                                               |                                    |                                      |
| <i>T. genevievae</i>   | HW20<br>(38°59'38.4"N 122°31'26.4"W)          | 60 cha, 0 mz, 0 oak                | 100%dg                               |
|                        | Antonio<br>(37°19'42.0"N 121°29'07.6"W)       | 248 cha, 0 mah, 0 oak              | 100%dg                               |

<sup>1</sup>Plant name abbreviations: ced, insense cedar (*Calocedrus decurrens*); cha, chamise (*Adenostoma fasciculatum*); df, douglas fir (*Pseudotsuga menziesii*); lil, californian lilac (*Ceanothus spp*); mah, montain mahogany (*Cercocarpus betuloides*); mz, manzanita (*Arctostaphylos spp*); oak, oak (*Quercus spp*); pin, pinus (*Pinus spp*); rdw, redwood (*sequoia sempervirens*); toy, toyon (*Heteromeles arbutifolia*).

<sup>2</sup>For morph name abbreviation, see Table S1

430

431

432 **Table S3. Overview of the *Timema* ssp used for the study of the fundamental feeding niche**

| <b><i>Timema</i> species</b> | <b>Reproductive mode</b> | <b>Original host plant</b>     | <b>GPS coordinates</b>       | <b>Number of individuals<sup>1</sup></b> |
|------------------------------|--------------------------|--------------------------------|------------------------------|------------------------------------------|
| <i>T. cristinae</i>          | Sexual                   | <i>Ceanothus thyrsiflorus</i>  | 34°30'19.7''N 119°16'53.6''W | 70                                       |
| <i>T. monikensis</i>         | Asexual                  | <i>Cercocarpus betuloides</i>  | 34°06'53.7''N 118°51'09.7''W | 100                                      |
| <i>T. poppensis</i>          | Sexual                   | <i>Pseudotsuga menziesii</i>   | 37°09'56.7''N 122°00'55.0''W | 70                                       |
| <i>T. douglasi</i>           | Asexual                  | <i>Pseudotsuga menziesii</i>   | 38°58'57.2''N 123°28'10.4''W | 70                                       |
| <i>T. californicum</i>       | Sexual                   | <i>Arctostaphylos glauca</i>   | 37°20'41.3''N 121°37'59.6''W | 80                                       |
| <i>T. shepardii</i>          | Asexual                  | <i>Arctostaphylos glauca</i>   | 39°12'02.8''N 123°17'38.2''W | 70                                       |
| <i>T. podura</i>             | Sexual                   | <i>Adenostoma fasciculatum</i> | 33°41'12.3''N 116°42'11.2''W | 105                                      |
| <i>T. genevieveae</i>        | Asexual                  | <i>Adenostoma fasciculatum</i> | 37°19'42.0''N 121°29'07.6''W | 70                                       |

433 <sup>1</sup> number of individuals used in the feeding experiment

434



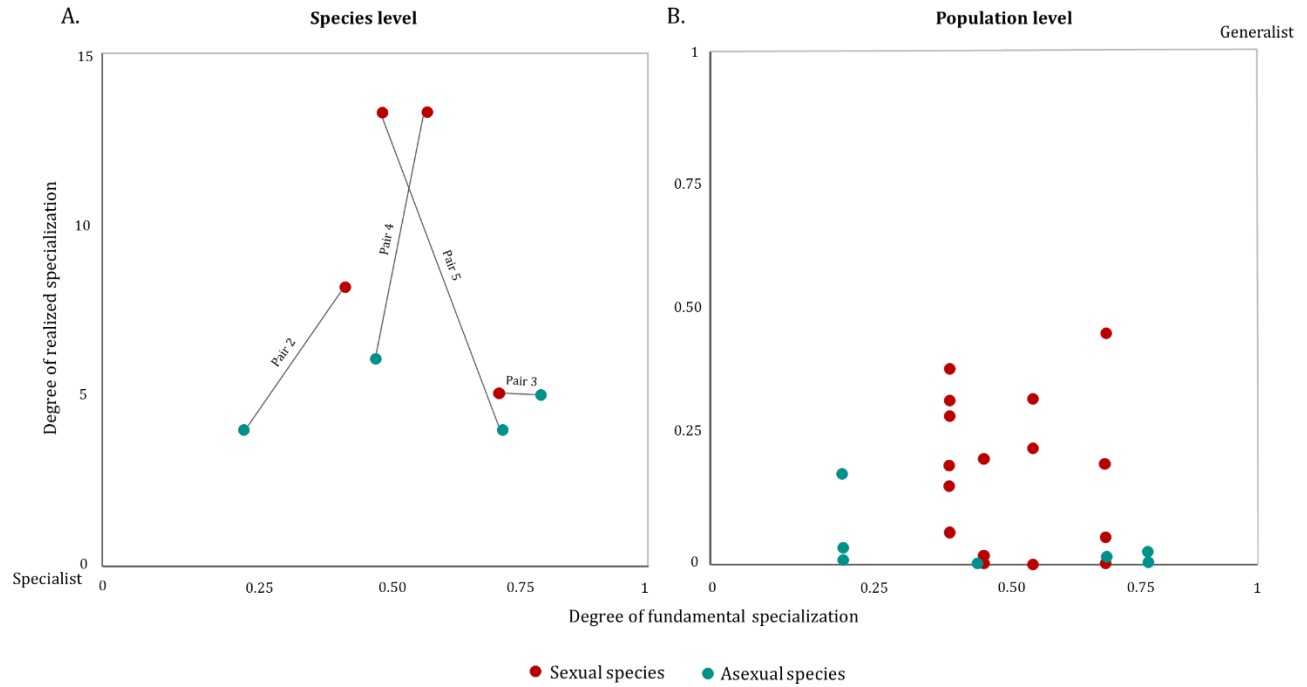

435

436 **Figure S1. Realized and fundamental feeding niche breadths of sexual and asexual stick**  
437 **insects are not correlated.** Shown is the specificity index Tau (calculated from the weight gain  
438 of insects) as a function of the realized feeding niche at the species level (A) or at the population  
439 level (B). For species pair numbers, see Fig. 2 in the main text.

440  
441

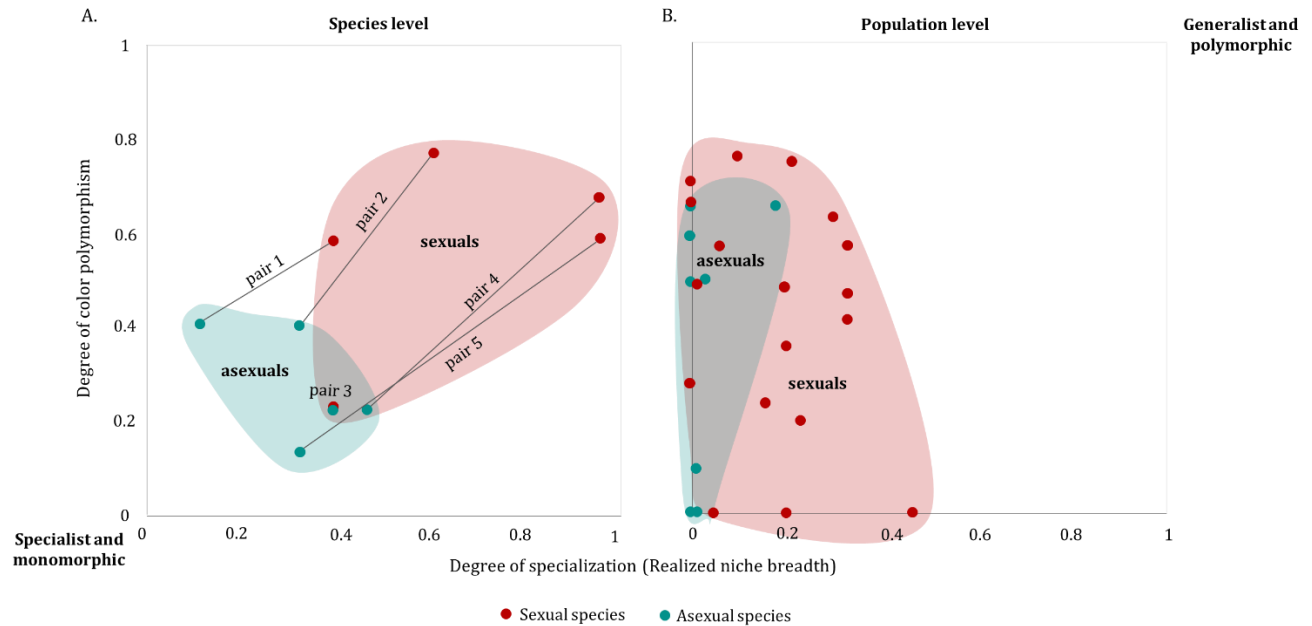

442  
443 **Figure S2. Correlation between color polymorphism and realized feeding niche breadth of**  
444 ***Timema* at the species (A) and at the population (B) levels.** At the species level (A), the  
445 polymorphism levels and realized feeding niche sizes are estimated from a count of the different  
446 color morphs and of the known host plants in each species respectively. At the population level  
447 (B), the polymorphism level is estimated using the inverse Simpson diversity index, and the  
448 realized feeding niche size is estimated using the Tau index. In this case, 0 corresponds to  
449 specialism and monomorphism, and 1 corresponds to generalism and extreme polymorphism.
